# Supplementary material for: SRA-Domain Proteins Required for DRM2-Mediated De Novo DNA Methylation
Source: PubMed Central journal article supplement (PMC2582956; doi:10.1371/journal.pgen.1000280), 2008-11-28

|                   |                     |                     |                       |                     |                     |                     |                     |                       |     |
|-------------------|---------------------|---------------------|-----------------------|---------------------|---------------------|---------------------|---------------------|-----------------------|-----|
|                   |                     | 20                  |                       | 40                  |                     | 60                  |                     | 80                    |     |
| AtSN1 uncovered   | G A A T A T C T G G | A A G T T C A G G C | C C A A A G G C C C   | T A C A T T T C C T | A G A G G G G G G A | T C C A C A C G A G | A A A T T C A T C T | C T T T T G G A G A   | 80  |
| AtSN1 cmt3-1.ab1  | G A A T A T C T G G | A A G T T T A G G T | T T A A A G G T T T   | T A T A T C T T T T | A G A G G T G G G A | T T T A T A T T A G | A A A T T T A T T T | T T T T T G G A A A   | 80  |
| AtSN1 cmt3-2.ab1  | G A A T A T C T G G | A A G T T C A G G T | C C A A A G G C C T   | T A C A T C T C C C | A G A G G T G G G A | C T C A T A C C A G | A A A T T C A T - T | T T T T T G G A A A   | 79  |
| AtSN1 cmt3-3.ab1  | G A A T A T C T G G | A A G T T C A G G C | C C A A A G G C C T   | T A C A T C T C C C | A G A G G G G G G A | C C C A T A C C A G | A A A T T C A T C T | T C T T T G G A A A   | 80  |
| AtSN1 cmt3-4.ab1  | G A A T A T C T G G | A A G T T C A G G T | C C A A A G G C C T   | T A C A T T T T T T | A G A G G G G G G A | T T T A T A T T A G | A G A T T C A T C T | T C T T T G G A A A   | 80  |
| AtSN1 cmt3-5.ab1  | G A A T A T T T G G | A A - C C C G G G T | T C A A A G G T T T   | T A T T T T T T T T | A G A G G G G G G A | T T T G T T T T A G | A A A T C T A - C T | T T T T T G G A A A   | 78  |
| AtSN1 cmt3-6.ab1  | G A A T A T T T G G | A A G T C T A G G T | C T A A A G C T T T   | T C T A T T T C T T | A G A G G T G G G A | T T T C T A T T A G | A A A T T T A T T T | T T T T T G G A C A   | 80  |
| AtSN1 cmt3-7.ab1  | G A A T A T T T G G | A A G T T T A G G T | C T A A A G G T T T   | T A T A T T T T T T | A G A G G G G G G A | T T T A T A T T A G | A A A T T T A T T T | T T T T T G G A A A   | 80  |
| AtSN1 cmt3-8.ab1  | G A A T A T T T G G | A A G T T T A G G T | T T A A A G G T C T   | T A T A T T T T T T | A G A G G G G G G A | T T T A T A T T A G | A A A T T T A T C T | T T T T T G G A A A   | 80  |
| AtSN1 cmt3-9.ab1  | G A A T A T T T G G | A A G T T T A G G T | T T A A A G G T T T   | T A T A T T T T T T | A G A G G G G G G A | T T T A T A T T A G | A A A T T T A T T T | T T T T T G G A A A   | 80  |
| AtSN1 cmt3-10.ab1 | G A A T A T T T G G | A A G T T T A G G T | T T A A A G G T T T   | T A T A T T T T T T | A G A G G T G G G A | T T T A T A T T A G | A A A T T T A T T T | T T T T T G G A A A   | 80  |
| AtSN1 cmt3-11.ab1 | G A G G A T T G G A | A A G T T T C A G C | C C A A A G A T T T T | T A T - T T T T T T | A A A G G G G G G G | T T T T A T T T T G | A A A T T T T T T T | T T T T T A G A C A   | 79  |
| AtSN1 cmt3-12.ab1 | G A A T A T T T G G | A A G T T T A G G T | T T A A A G G T T T   | T A T A T T T T T T | A G A G G G G G G A | T T T G T A T T A G | A A A T C T A T T T | T T T T T - G G A A A | 79  |
| AtSN1 cmt3-13.ab1 | G A A T A T T T G G | A A G T T T A G G T | T T A A A G G T T T   | T A T A T T T T T T | A G A G G G G G G A | T T T A T A T T A G | A A A T T T A T T T | T T T T T G G A A A   | 80  |
|                   |                     | 100                 |                       | 120                 |                     | 140                 |                     |                       |     |
| AtSN1 uncovered   | A G A G A T C C C T | C C C A A G G T G C | C T G A A T C C C A   | G C A C C T C C A C | C T G G G A G A T T | T A C C A C T G G G | C C A A C A A C A C | G T T G G T           | 156 |
| AtSN1 cmt3-1.ab1  | A G A G A T T T T T | T T T A A T G T G T | T T T G A A T T T A   | G T A T T T T T A T | C T G A G A G A T T | T A T T A T T G G G | C C A A C A A T A C | G T T G G T           | 156 |
| AtSN1 cmt3-2.ab1  | A G A G A T C C T T | C C C A A T G T G T | C T G A A T C C A     | G C A C C T C T A T | C T G A G A G A T T | T A C C A C T G G G | C C A A C A A C A T | G T T G G T           | 155 |
| AtSN1 cmt3-3.ab1  | A G A G A T C C T T | C C C A A G G T G T | C T G A A T C C A     | G C A C C T C T A T | C T G A G A G A T T | T A C C A C T G G G | T C A A C A A C A C | G T T G G T           | 156 |
| AtSN1 cmt3-4.ab1  | A G A G A T C C T T | C C C A A T G T G T | C T G A A T T C A     | G C A T C T C T A T | T T G A G A G A T T | T A C C A T T G G G | C C A A C A A T A C | G T T G G T           | 156 |
| AtSN1 cmt3-5.ab1  | A G A G A T T T T T | T T T A A T G T G C | T T T G A A T C T A   | G T A T T T T T A T | T T G A G A G A T T | T A C T A T T G C G | T T A A T A A C A T | A C T G G T           | 154 |
| AtSN1 cmt3-6.ab1  | A G A G A T T T T T | T T T A A T G T G T | T T T G A A T C C A   | G T A T T T T T A T | T T G A G A G A T T | T A T T A T T G G G | T T A A C A A T A T | G C T G G T           | 156 |
| AtSN1 cmt3-7.ab1  | A G A G A T T T T T | T T T A A T G T G T | T T T G A A T T T A   | G T A T T T T T A T | T T G A G A G A T T | T A T T A T T G G G | T T A A T A A T A T | G T T G G T           | 156 |
| AtSN1 cmt3-8.ab1  | A G A G A T C C T T | C C C A A T G T G T | C T G A A T C C A     | G A C C G T T T A T | T T G A G A G A T T | T A T T A T T G G G | T C A A T A A T A C | G T T G G T           | 156 |
| AtSN1 cmt3-9.ab1  | A G A G A C T T T T | T T T A A T G T G T | T T T G A A T T T A   | G T A T T T T T A T | T T G A G A G A T T | T A T T A T T G G G | T T A A T A A T A C | G T T G G T           | 156 |
| AtSN1 cmt3-10.ab1 | A G A G A T T T T T | T T T A A C G T G T | T T T G A A T T T A   | G T A T C T T T A T | C T G A G A G A T T | T A T T A T T G G G | T T A A T A A T A C | G T T G G T           | 156 |
| AtSN1 cmt3-11.ab1 | G A A G T T T T T T | T T A A A T G G T T | T T A A A G A T T T C | G T A T T T T T - T | T T G A G A G A A T | T T T G T C T G G A | T T A A A A C T A G | G T A G A G           | 154 |
| AtSN1 cmt3-12.ab1 | A G A G A T T T T T | T T T A A T G T G T | T T T G A A T T T A   | G T A T T T T T A T | T T G A G A G A T T | T A T T A T T G G G | T T A A T A A T A T | G T T G G T           | 155 |
| AtSN1 cmt3-13.ab1 | A G A G A T T T T T | T T T A A G T G T   | T T T G A A T T T A   | G T A T T T T T A T | C T G A G A G A T T | T A T T A T T G G G | T T A A T A A T A T | G T T G G T           | 156 |







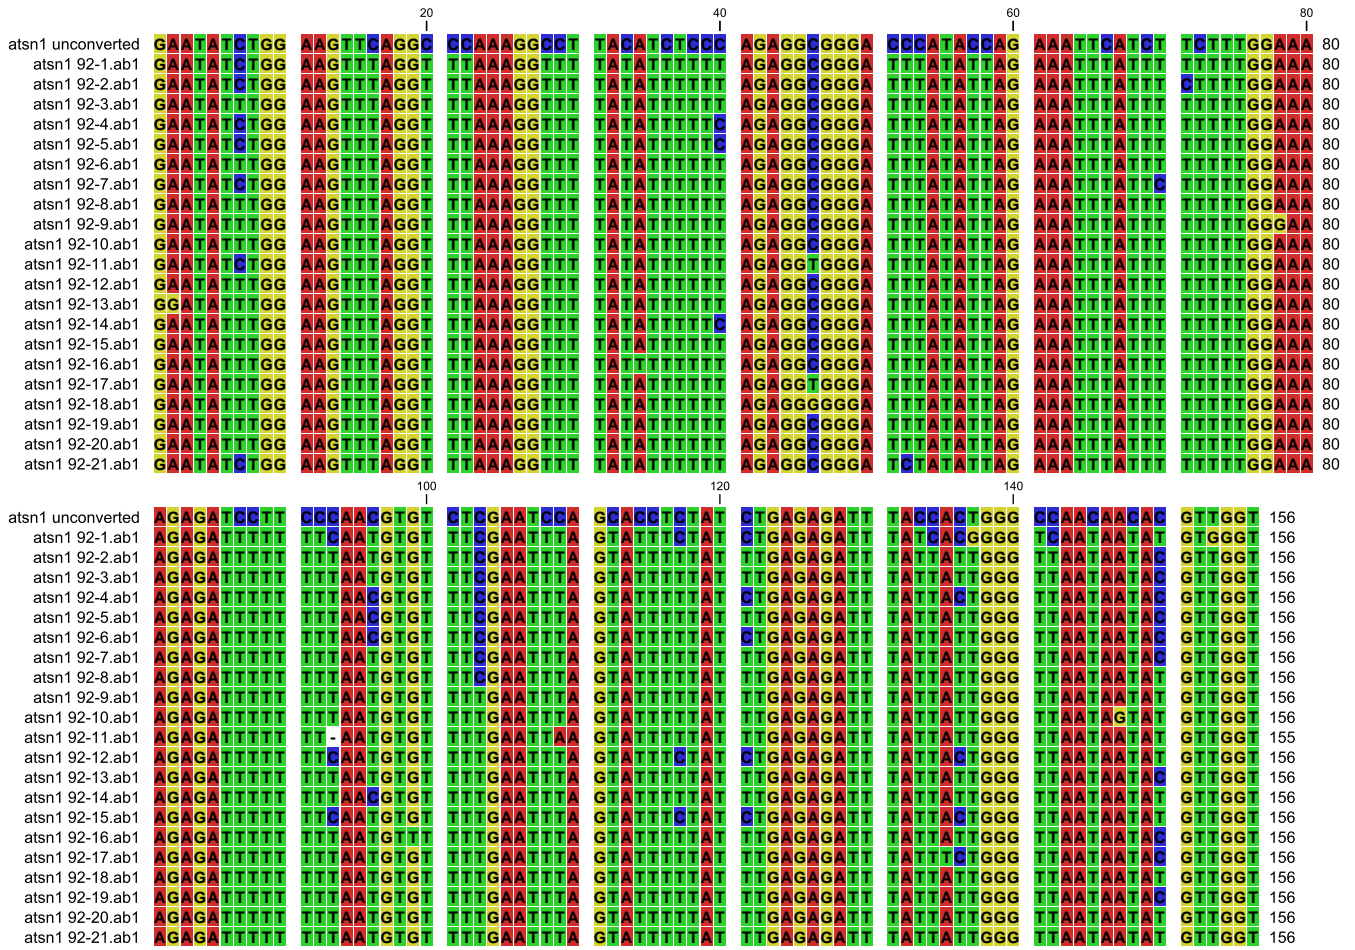

















```

meaisr TCCAAAATTC GGTTAGATTT CACAAGTCA TATTACG 276
mea 2-1.ab1 TTTAAAATTC GGTTAGATTT TATAAGTTA TATTACG 276
mea 2-2.ab1 TTTAAAATTC GGTTAGATTT TATAAGTTA TATTACG 276
mea 2-3.ab1 TTTAAAATTC GGTTAGATTT TATAAGTTA TATTACG 276
mea 2-4.ab1 TCCAAAATTC GGTTAGATTT CACAAGTCA TATTACG 276
mea 2-5.ab1 TTTAAAATTC GGTTAGATTT TACAAGTCA TATTACG 276
mea 2-6.ab1 TTTAAAATTC GGTTAGATTT TATAAGTTA TATTACG 276
mea 2-7.ab1 TTTAAAATTC GGTTAGATTT TACAAGTCA TATTACG 276
mea 2-8.ab1 TTTAAAATTC GGTTAGATTT TATAAGTTA TATTACG 276
mea 2-9.ab1 TTTAAAATTC GGTTAGATTT TATAAGTTA TATCATG 276
mea 2-10.ab1 TTTAAAATTC GGTTAGATTT TATAAGTTA TATTATG 275
mea 2-11.ab1 TTTAAAATTC GGTTAGATTT TATAAGTTA TATTACG 277
mea 2-12.ab1 TTTAAAATTC GGTTAGATTT TATAAGTTA TATTACG 276
mea 2-13.ab1 TTTAAAATTC GGTTAGATTT TATAAGTTA TATTACG 275
mea 2-14.ab1 TTTAAAATTC GGTTAGATTT TATAAGTTA TATTACG 276
mea 2-15.ab1 TTTAAAATTC GGTTAGATTT TATAAGTTA TATTACG 276
mea 2-16.ab1 TTTAAAATTC GGTTAGATTT TATAAGTTA TATTACG 276
mea 2-17.ab1 TTTAAAATTC GGTTAGATTT TATAAGTTA TATTACG 276
mea 2-18.ab1 TTTAAAATTC GGTTAGATTT TATAAGTTA TATTACG 276
mea 2-19.ab1 TTTAAAATTC GGTTAGATTT TATAAGTTA TATTACG 276
mea 2-20.ab1 TTTAAAATTC GGTTAGATTT TATAAGTTA TATTACG 276
mea 2-21.ab1 TTTAAAATTC GGTTAGATTT TATAAGTTA TATTACG 276

```









```

mea isr unconverted CCAAATCCG GTTAGATTTT ACAA GTCAI ATTACG 276
mea 492-1.ab1 TTA AAAATTCCG GTTAGATTTT ATAA GTTTAT ATTACG 276
mea 492-2.ab1 TTA AAAATTCCG GTTAGATTTT ATAA GTTTAT ATTACG 276
mea 492-3.ab1 TTA AAAATTCCG GTTAGATTTT ATAA GTTTAT ATTACG 276
mea 492-4.ab1 TTA AAAATTCCG GTTAGATTTT ATAA GTTTAT ATTACG 276
mea 492-5.ab1 TTA AAAATTCCG GTTAGATTTT ATAA GTTTAT GTTTATG 276
mea 492-6.ab1 TTA AAAATTCCG GTTAGATTTT ATAA GTTTAT ATTACG 276
mea 492-7.ab1 TTA AAAATTCCG GTTAGATTTT ATAA GTTTAT ATTACG 276
mea 492-8.ab1 TTA AAAATTCCG GTTAGATTTT ATAA GTTTAT ATTACG 276
mea 492-9.ab1 TTA AAAATTCCG GTTAGATTTT ATAA GTTTAT ATTACG 276
mea 492-10.ab1 TTA AAAATTCCG GTTAGATTTT ATAA GGTAT ATTACG 275
mea 492-11.ab1 TTA AAAATTCCG GTTAGATTTT ATAA GTTTAT ATTACG 276
mea 492-12.ab1 TTA AAAATTCCG GTTAGATTTT ATAA GTTTAT ATTACG 275
mea 492-13.ab1 TTA AAAATTCCG GTTAGATTTT ATAA GTTTAT ATTACG 276
mea 492-14.ab1 TTA AAAATTCCG GTTAGATTTT ATAA GTTTAT ATTACG 276
mea 492-15.ab1 TTA AAAATTCCG GTTAGATTTT ATAA GTTTAT ATTACG 276
mea 492-16.ab1 TTA AAAATTCCG GTTAGATTTT ATAA GTTTAT ATTACG 276
mea 492-17.ab1 TTA AAAATTCCG GTTAGATTTT ATAA GTTTAT ATTACG 276
mea 492-18.ab1 TTA AAAATTCCG GTTAGATTTT ATAA GTTTAT ATTACG 276
mea 492-19.ab1 TTA AAAATTCCG GTTAGATTTT ATAA GTTTAT ATTACG 276
mea 492-20.ab1 TTA AAAATTCCG GTTAGATTTT ATAA GTTTAT ATTACG 276
mea 492-21.ab1 TTA AAAATTCCG GTTAGATTTT ATAA GTTTAT ATTACG 276
mea 492-22.ab1 TTA AAAATTCCG GTTAGATTTT ATAA GTTTAT ATTACG 276
mea 492-23.ab1 TTA AAAATTCCG GTTAGATTTT ATAA GTTTAT ATTACG 276
mea 492-24.ab1 TTA AAAATTCCG GTTAGATTTT ATAA GTTTAT ATTACG 276

```

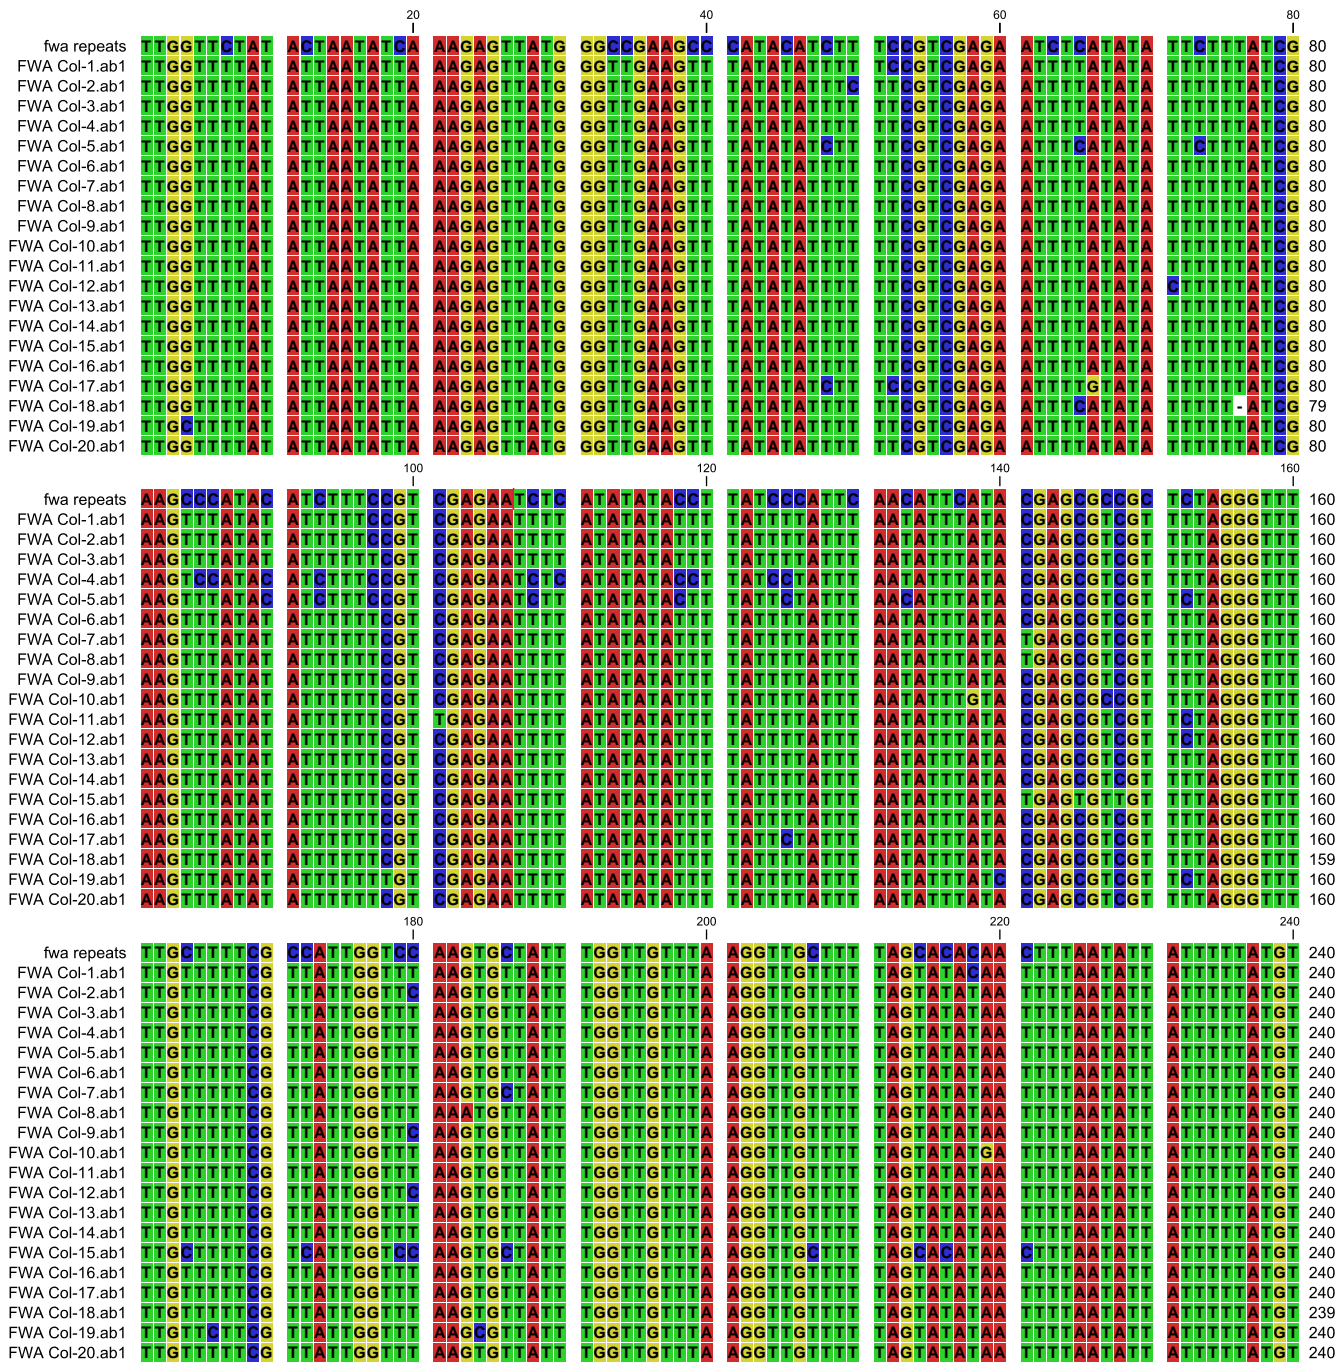





|                |       |       |       |       |      |       |      |        |       |        |      |     |       |      |        |      |      |     |     |
|----------------|-------|-------|-------|-------|------|-------|------|--------|-------|--------|------|-----|-------|------|--------|------|------|-----|-----|
|                |       | 500   |       | 520   |      | 540   |      | 560    |       |        |      |     |       |      |        |      |      |     |     |
| fwa repeats    | ATAC  | GGAA  | TTGA  | TTTT  | GTTG | TTTT  | TTAG | CCAAAA | ATCA  | GATTTT | TTTT | ATC | TTTT  | GTTT | AGAGAA | TGAT | TTTT | GGT | 560 |
| FWA Col-1.ab1  | ATATT | GATAA | TTAGA | TTTTT | GTTG | TTTTT | TTAG | TTGAAA | ATTAG | ATTTT  | TTTT | AT  | ATTTT | GTTT | AGAGAA | TGAT | TTTT | GGT | 557 |
| FWA Col-2.ab1  | ATATT | GATAA | TTAGA | TTTTT | GTTG | TTTTT | TTAG | TTGAAA | ATTAG | ATTTT  | TTTT | AT  | ATTTT | GTTT | AGAGAA | TGAT | TTTT | GGT | 560 |
| FWA Col-3.ab1  | ATATT | GATAA | TTAGA | TTTTT | GTTG | TTTTT | TTAG | TTGAAA | ATTAG | ATTTT  | TTTT | AT  | ATTTT | GTTT | AGAGAA | TGAT | TTTT | GGT | 558 |
| FWA Col-4.ab1  | ATATT | GATAA | TTAGA | TTTTT | GTTG | TTTTT | TTAG | TTGAAA | ATTAG | ATTTT  | TTTT | AT  | ATTTT | GTTT | AGAGAA | TGAT | TTTT | GGT | 560 |
| FWA Col-5.ab1  | ATAC  | GGAA  | TTGA  | TTTT  | GTTG | TTTT  | TTAG | TTGAAA | ATTAG | ATTTT  | TTTT | AT  | ATTTT | GTTT | AGAGAA | TGAT | TTTT | GGT | 560 |
| FWA Col-6.ab1  | ATAC  | GGAA  | TTGA  | TTTT  | GTTG | TTTT  | TTAG | TTGAAA | ATTAG | ATTTT  | TTTT | AT  | ATTTT | GTTT | AGAGAA | TGAT | TTTT | GGT | 559 |
| FWA Col-7.ab1  | ATATT | GATAA | TTAGA | TTTTT | GTTG | TTTTT | TTAG | TTGAAA | ATTAG | ATTTT  | TTTT | AT  | ATTTT | GTTT | AGAGAA | TGAT | TTTT | GGT | 559 |
| FWA Col-8.ab1  | ATATT | GATAA | TTAGA | TTTTT | GTTG | TTTTT | TTAG | TTGAAA | ATTAG | ATTTT  | TTTT | AT  | ATTTT | GTTT | AGAGAA | TGAT | TTTT | GGT | 560 |
| FWA Col-9.ab1  | ATATT | GATAA | TTAGA | TTTTT | GTTG | TTTTT | TTAG | TTGAAA | ATTAG | ATTTT  | TTTT | AT  | ATTTT | GTTT | AGAGAA | TGAT | TTTT | GGT | 560 |
| FWA Col-10.ab1 | ATAC  | GGAA  | TTGA  | TTTT  | GTTG | TTTT  | TTAG | TTGAAA | ATTAG | ATTTT  | TTTT | AT  | ATTTT | GTTT | AGAGAA | TGAT | TTTT | GGT | 560 |
| FWA Col-11.ab1 | ATATT | GATAA | TTAGA | TTTTT | GTTG | TTTTT | TTAG | TTGAAA | ATTAG | ATTTT  | TTTT | AT  | ATTTT | GTTT | AGAGAA | TGAT | TTTT | GGT | 560 |
| FWA Col-12.ab1 | ATATT | GATAA | TTAGA | TTTTT | GTTG | TTTTT | TTAG | TTGAAA | ATTAG | ATTTT  | TTTT | AT  | ATTTT | GTTT | AGAGAA | TGAT | TTTT | GGT | 559 |
| FWA Col-13.ab1 | ATATT | GATAA | TTAGA | TTTTT | GTTG | TTTTT | TTAG | TTGAAA | ATTAG | ATTTT  | TTTT | AT  | ATTTT | GTTT | AGAGAA | TGAT | TTTT | GGT | 559 |
| FWA Col-14.ab1 | ATATT | GATAA | TTAGA | TTTTT | GTTG | TTTTT | TTAG | TTGAAA | ATTAG | ATTTT  | TTTT | AT  | ATTTT | GTTT | AGAGAA | TGAT | TTTT | GGT | 559 |
| FWA Col-15.ab1 | ATATT | GATAA | TTAGA | TTTTT | GTTG | TTTTT | TTAG | TTGAAA | ATTAG | ATTTT  | TTTT | AT  | ATTTT | GTTT | AGAGAA | TGAT | TTTT | GGT | 560 |
| FWA Col-16.ab1 | ATATT | GATAA | TTAGA | TTTTT | GTTG | TTTTT | TTAG | TTGAAA | ATTAG | ATTTT  | TTTT | AT  | ATTTT | GTTT | AGAGAA | TGAT | TTTT | GGT | 559 |
| FWA Col-17.ab1 | ATATT | GATAA | TTAGA | TTTTT | GTTG | TTTTT | TTAG | TTGAAA | ATTAG | ATTTT  | TTTT | AT  | ATTTT | GTTT | AGAGAA | TGAT | TTTT | GGT | 560 |
| FWA Col-18.ab1 | ATAC  | GGAA  | TTGA  | TTTT  | GTTG | TTTT  | TTAG | TTGAAA | ATTAG | ATTTT  | TTTT | AT  | ATTTT | GTTT | AGAGAA | TGAT | TTTT | GGT | 559 |
| FWA Col-19.ab1 | ATATT | GATAA | TTAGA | TTTTT | GTTG | TTTTT | TTAG | TTGAAA | ATTAG | ATTTT  | TTTT | AT  | ATTTT | GTTT | AGAGAA | TGAT | TTTT | GGT | 558 |
| FWA Col-20.ab1 | ATATT | GATAA | TTAGA | TTTTT | GTTG | TTTTT | TTAG | TTGAAA | ATTAG | ATTTT  | TTTT | AT  | ATTTT | GTTT | AGAGAA | TGAT | TTTT | GGT | 559 |

|                |        |      |     |     |
|----------------|--------|------|-----|-----|
| fwa repeats    | TAAGGG | CGAT | TTG | 573 |
| FWA Col-1.ab1  | TAAGGG | CGAA | TTG | 570 |
| FWA Col-2.ab1  | TAAGGG | CGAA | TTG | 573 |
| FWA Col-3.ab1  | TAAGGG | CGAA | TTG | 571 |
| FWA Col-4.ab1  | TAAGGG | CGAA | TTG | 573 |
| FWA Col-5.ab1  | TAAGGG | CGAA | TTG | 573 |
| FWA Col-6.ab1  | TAAGGG | CGAA | TTG | 572 |
| FWA Col-7.ab1  | TAAGGG | CGAA | TTG | 572 |
| FWA Col-8.ab1  | TAAGGG | CGAA | TTG | 573 |
| FWA Col-9.ab1  | TAAGGG | CGAA | TTG | 573 |
| FWA Col-10.ab1 | TAAGGG | CGAA | TTG | 573 |
| FWA Col-11.ab1 | TAAGGG | CGAA | TTG | 573 |
| FWA Col-12.ab1 | TAAGGG | CGAA | TTG | 572 |
| FWA Col-13.ab1 | TAAGGG | CGAA | TTG | 572 |
| FWA Col-14.ab1 | TAAGGG | CGAA | TTG | 572 |
| FWA Col-15.ab1 | TAAGGG | CGAA | TTG | 573 |
| FWA Col-16.ab1 | TAAGGG | CGAA | TTG | 572 |
| FWA Col-17.ab1 | TAAGGG | CGAA | TTG | 573 |
| FWA Col-18.ab1 | TAAGGG | CGAA | TTG | 572 |
| FWA Col-19.ab1 | TAAGGG | CGAA | TTG | 571 |
| FWA Col-20.ab1 | TAAGGG | CGAA | TTG | 572 |









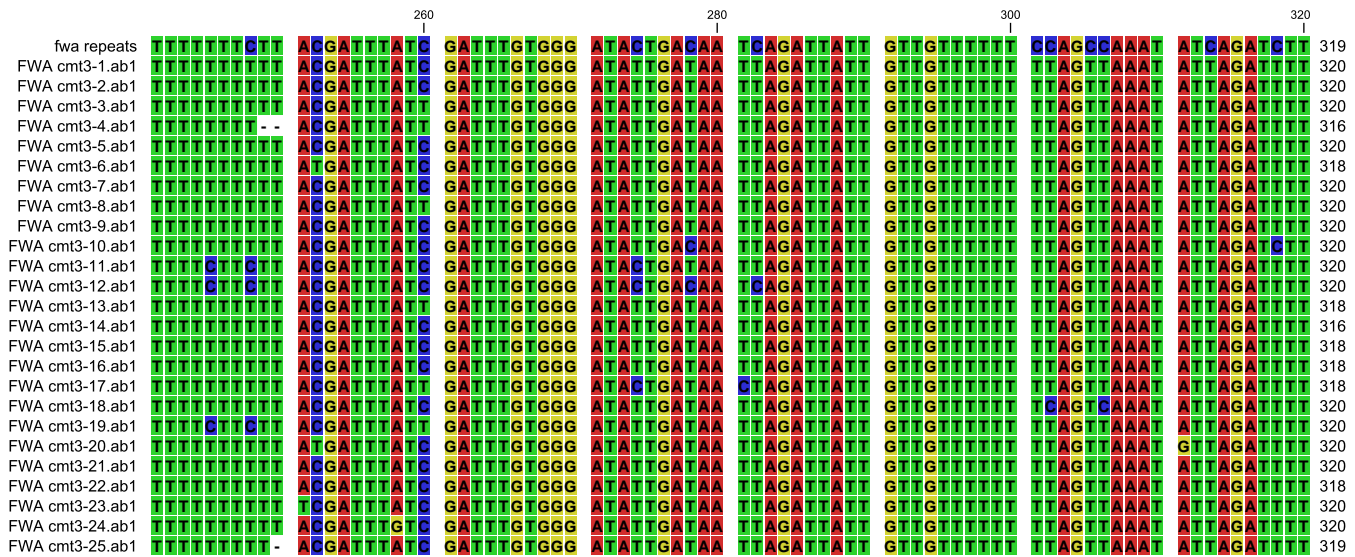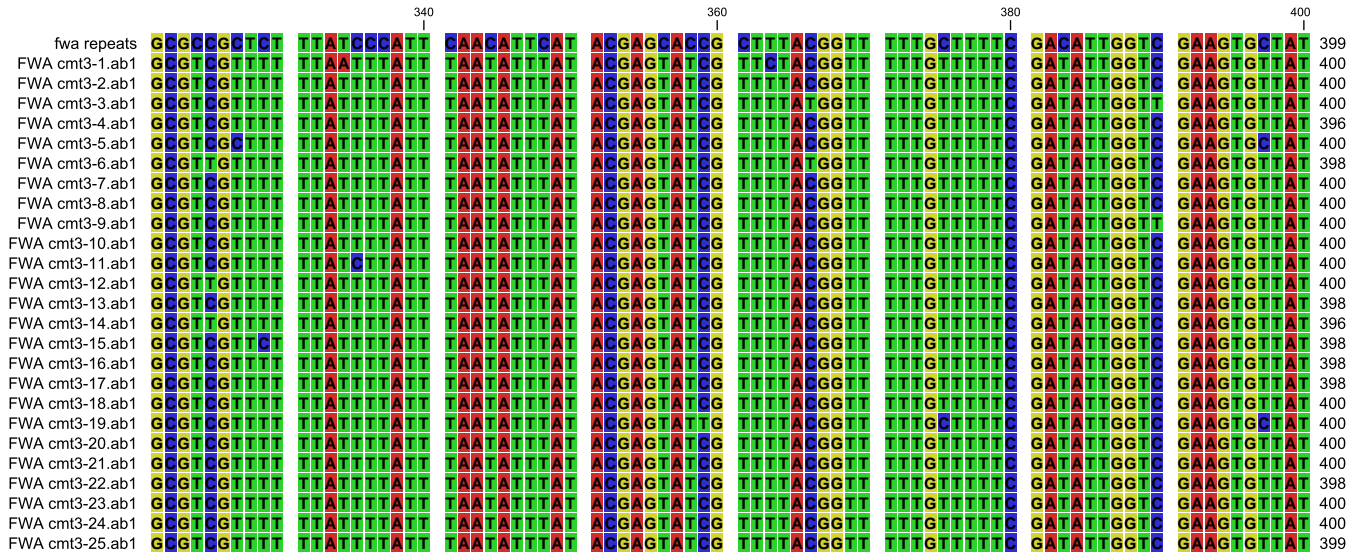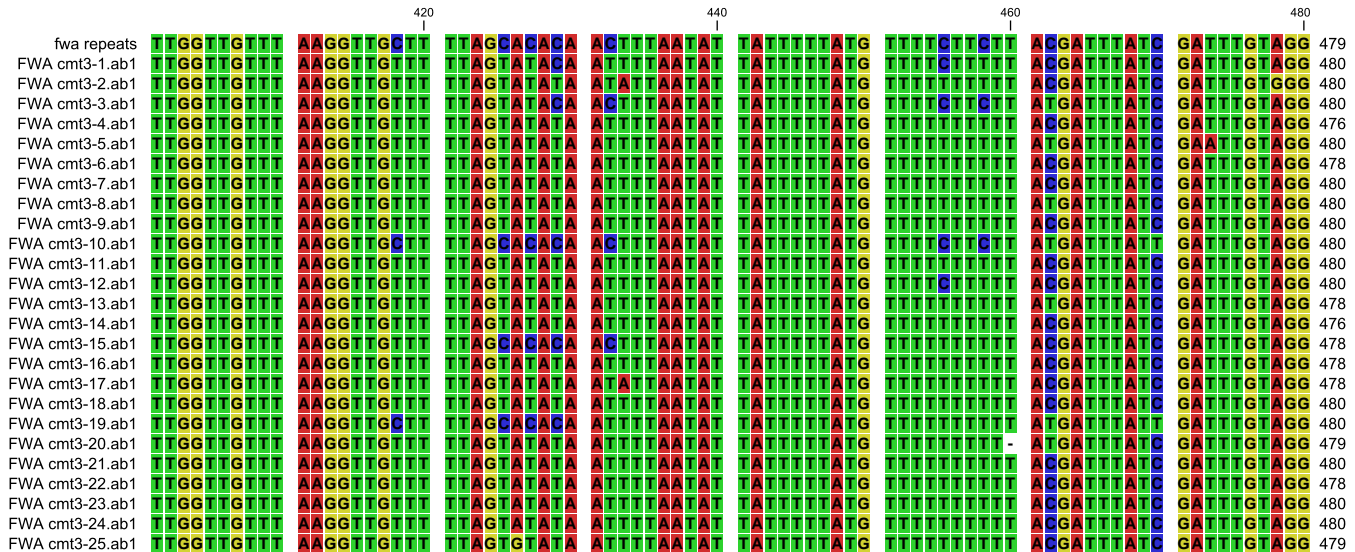





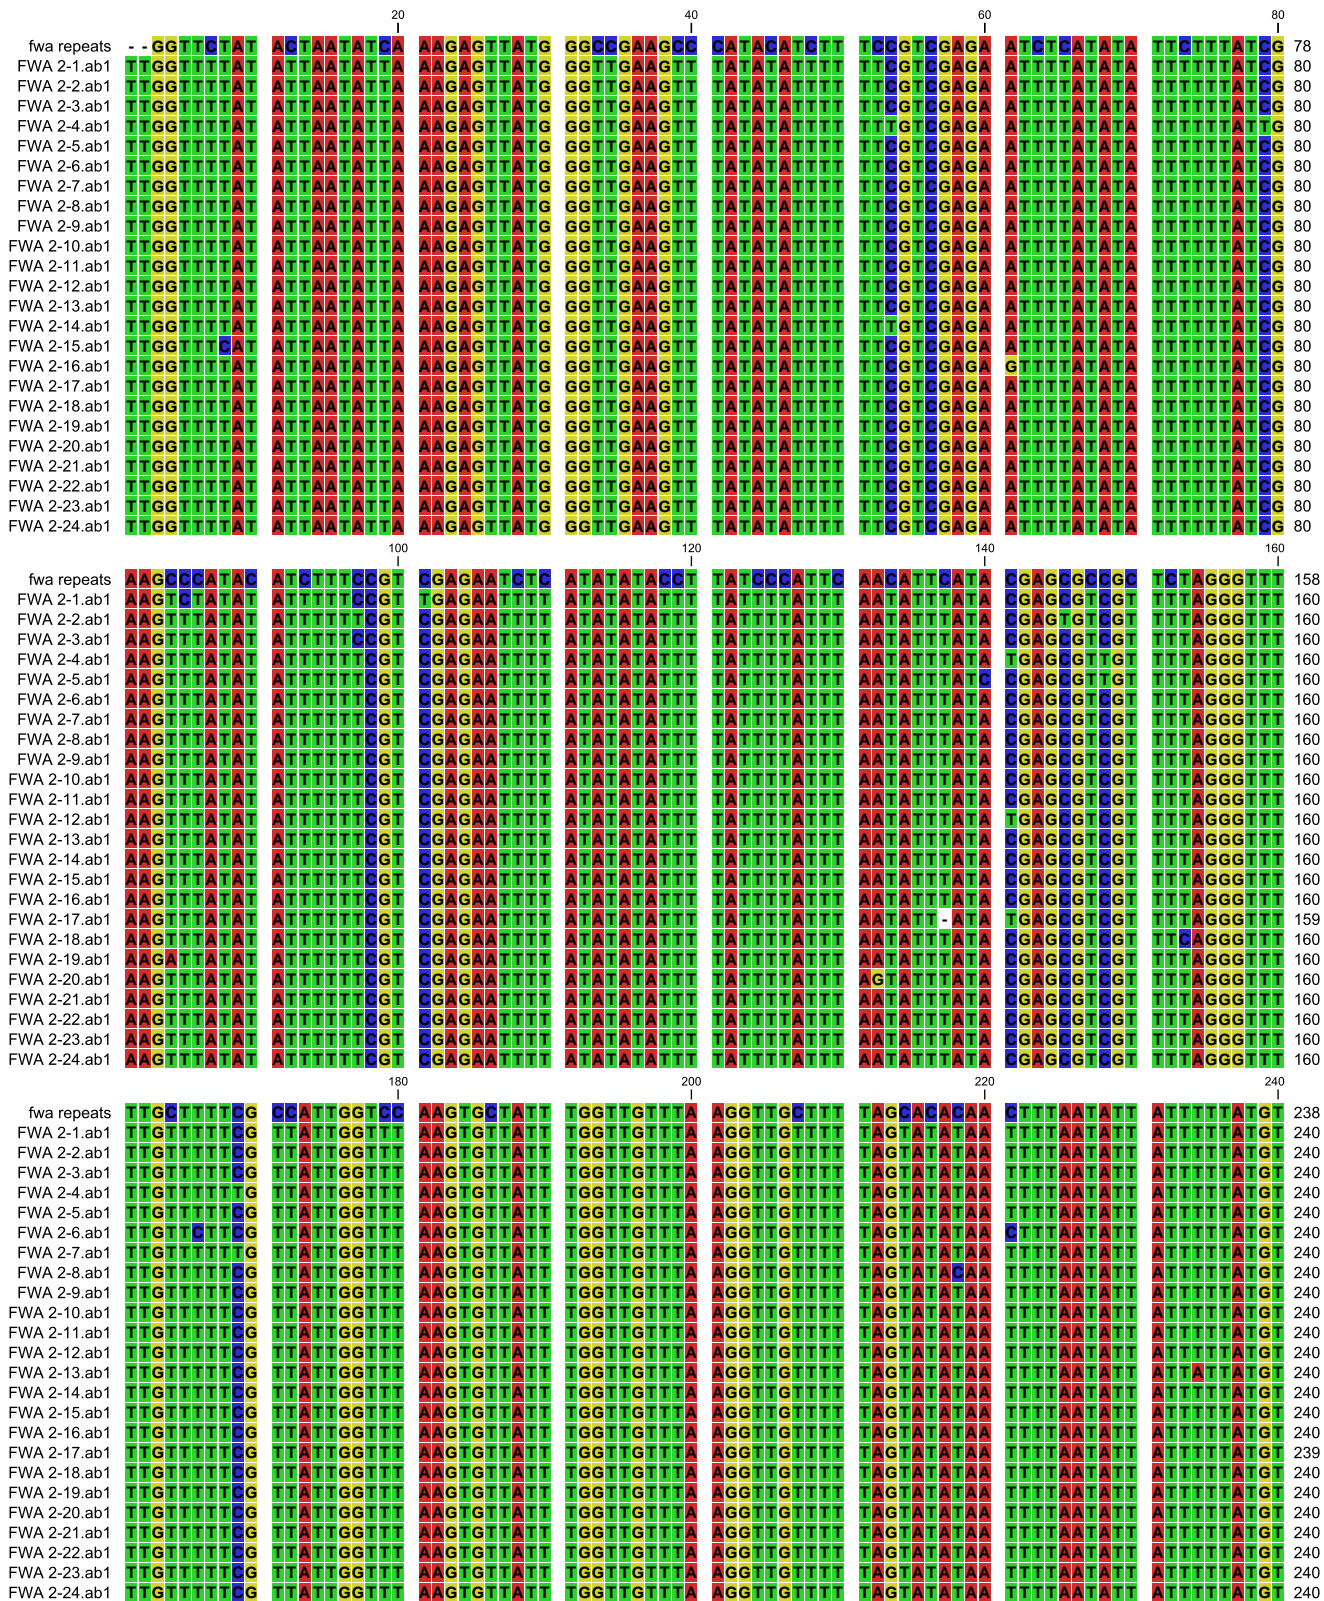

















440 480 520

fw repeats  
Consensus

FWA492-2.ab1  
FWA492-3.ab1  
FWA492-4.ab1  
FWA492-5.ab1  
FWA492-6.ab1  
FWA492-7.ab1  
FWA492-8.ab1  
FWA492-9.ab1  
FWA492-10.ab1

500 520 540 560

fw repeats  
Consensus

FWA492-2.ab1  
FWA492-3.ab1  
FWA492-4.ab1  
FWA492-5.ab1  
FWA492-6.ab1  
FWA492-7.ab1  
FWA492-8.ab1  
FWA492-9.ab1  
FWA492-10.ab1

580

fw repeats  
Consensus

FWA492-2.ab1  
FWA492-3.ab1  
FWA492-4.ab1  
FWA492-5.ab1  
FWA492-6.ab1  
FWA492-7.ab1  
FWA492-8.ab1  
FWA492-9.ab1  
FWA492-10.ab1







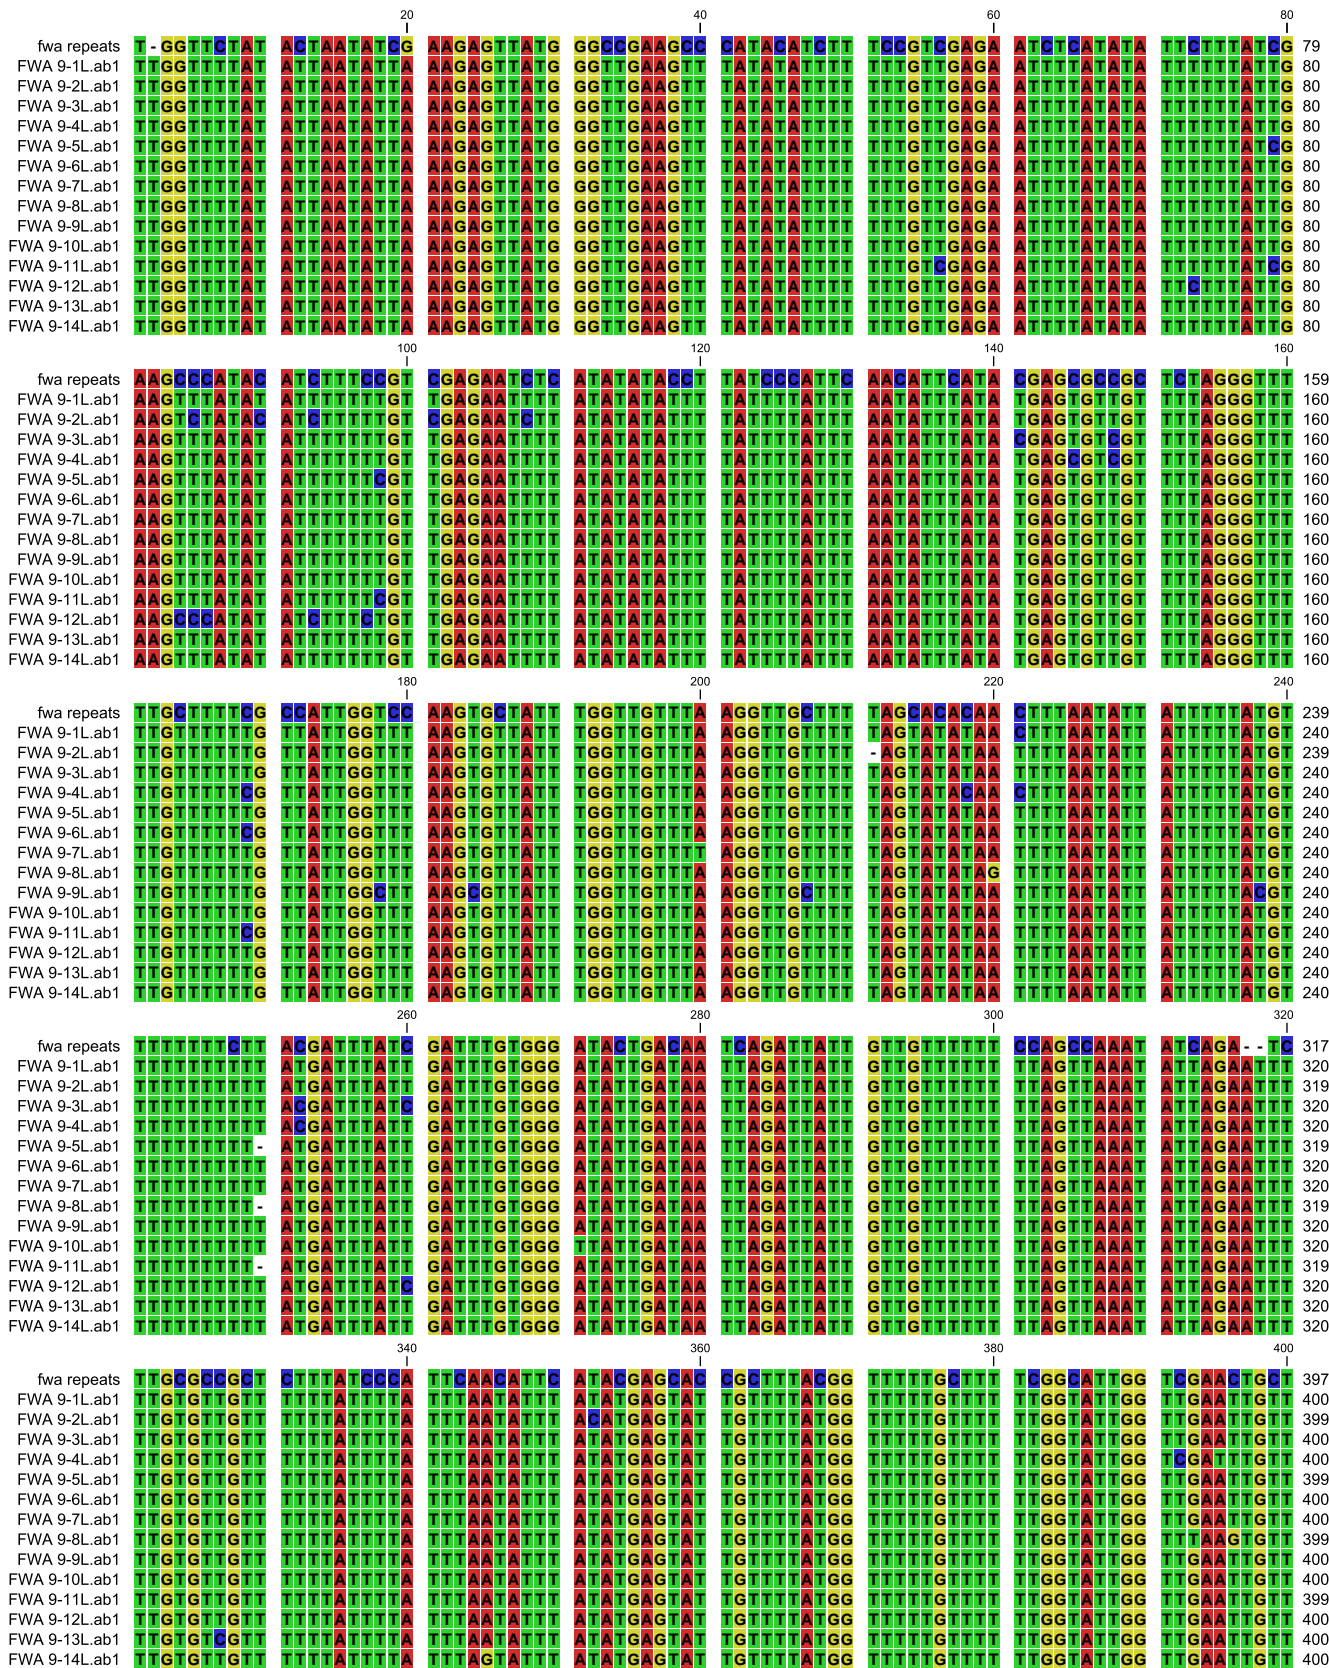

|               |               |              |              |              |               |                |                |              |     |
|---------------|---------------|--------------|--------------|--------------|---------------|----------------|----------------|--------------|-----|
|               |               | 420          |              | 440          |               | 460            |                | 480          |     |
| fwa repeats   | A TTT GGT TGT | TTAA GGT TGT | TTTT AGT ATA | TAAT TTT AAT | ATT AT TTT TA | TG TTT TTT TTT | TTA TGAT TTA   | TTGA TTT GTA | 477 |
| FWA 9-1L.ab1  | A TTT GGT TGT | TTAA GGT TGT | TTTT AGT ATA | TAAT TTT AAT | ATT AT TTT TA | TG TTT TTT TTT | TTA TGAT TTA   | TTGA TTT GTA | 480 |
| FWA 9-2L.ab1  | A TTT GGT TGT | TTAA GGT TGT | TTTT AGT ATA | TAAT TTT AAT | ATT AT TTT TA | TG TTT TTT TTT | TTA TGAT TTA   | TTGA TTT GTA | 479 |
| FWA 9-3L.ab1  | A TTT GGT TGT | TTAA GGT TGT | TTTT AGT ATA | TAAT TTT AAT | ATT AT TTT TA | TG TTT TTT TTT | TTA TGAT TTA   | TTGA TTT GTA | 480 |
| FWA 9-4L.ab1  | A TTT GGT TGT | TTAA GGT TGT | TTTT AGT ATA | TAAT TTT AAT | ATT AT TTT TA | TG TTT TTT TTT | TTA TGAT TTA   | TTGA TTT GTA | 480 |
| FWA 9-5L.ab1  | A TTT GGT TGT | TTAA GGT TGT | TTTT AGT ATA | TAAT TTT AAT | ATT AT TTT TA | TG TTT TTT TTT | TTA TGAT TTA   | TTGA TTT GTA | 479 |
| FWA 9-6L.ab1  | A TTT GGT TGT | TTAA GGT TGT | TTTT AGT ATA | TAAT TTT AAT | ATT AT TTT TA | TG TTT TTT TTT | TTA TGAT TTA   | TTGA TTT GTA | 480 |
| FWA 9-7L.ab1  | A TTT GGT TGT | TTAA GGT TGT | TTTT AGT ATA | TAAT TTT AAT | ATT AT TTT TA | TG TTT TTT TTT | TTA TGAT TTA   | TTGA TTT GTA | 480 |
| FWA 9-8L.ab1  | A TTT GGT TGT | TTAA GGT TGT | TTTT AGT ATA | TAAT TTT AAT | ATT AT TTT TA | TG TTT TTT TTT | TTA TGAT TTA   | TTGA TTT GTA | 479 |
| FWA 9-9L.ab1  | A TTT GGT TGT | TTAA GGT TGT | TTTT AGT ATA | TAAT TTT AAT | ATT AT TTT TA | TG TTT TTT TTT | TTA TGAT TTA   | TTGA TTT GTA | 480 |
| FWA 9-10L.ab1 | A TTT GGT TGT | TTAA GGT TGT | TTTT AGT ATA | TAAT TTT AAT | ATT AT TTT TA | TG TTT TTT TTT | T - A TGAT TTA | TTGA TTT GTA | 479 |
| FWA 9-11L.ab1 | A TTT GGT TGT | TTAA GGT TGT | TTTT AGT ATA | TAAT TTT AAT | ATT AT TTT TA | TG TTT TTT TTT | TTA TGAT TTA   | TTGA TTT GTA | 480 |
| FWA 9-12L.ab1 | A TTT GGT TGT | TTAA GGT TGT | TTTT AGT ATA | TAAT TTT AAT | ATT AT TTT TA | TG TTT TTT TTT | TTA TGAT TTA   | TTGA TTT GTA | 480 |
| FWA 9-13L.ab1 | A TTT GGT TGT | TTAA GGT TGT | TTTT AGT ATA | TAAT TTT AAT | ATT AT TTT TA | TG TTT TTT TTT | T - A TGAT TTA | TTGA TTT GTA | 479 |
| FWA 9-14L.ab1 | A TTT GGT TGT | TTAA GGT TGT | TTTT AGT ATA | TAAT TTT AAT | ATT AT TTT TA | TG TTT TTT TTT | T - A TGAT TTA | TTGA TTT GTA | 479 |

|               |              |             |            |             |             |              |            |            |     |
|---------------|--------------|-------------|------------|-------------|-------------|--------------|------------|------------|-----|
|               |              | 500         |            | 520         |             | 540          |            | 560        |     |
| fwa repeats   | GGAT AACTGAC | AAATCAGATTT | TTGTTGTTTT | TTTTCAGCCAA | AAATCAGATTT | TTTTTTACAC   | TTTGTTTAGA | GAAAGATTTT | 557 |
| FWA 9-1L.ab1  | GGAT AACTGAT | AAATCAGATTT | TTGTTGTTTT | TTTTCAGTTAA | AAATCAGATTT | TTTTTT - AAT | TTTGTTTAGA | GAAAGATTTT | 559 |
| FWA 9-2L.ab1  | GGAT AACTGAT | AAATCAGATTT | TTGTTGTTTT | TTTTCAGTTAA | AAATCAGATTT | TTTTTT - AAT | TTTGTTTAGA | GAAAGATTTT | 558 |
| FWA 9-3L.ab1  | GGAT AACTGAT | AAATCAGATTT | TTGTTGTTTT | TTTTCAGTTAA | AAATCAGATTT | TTTTTT - AAT | TTTGTTTAGA | GAAAGATTTT | 558 |
| FWA 9-4L.ab1  | GGAT AACTGAT | AAATCAGATTT | TTGTTGTTTT | TTTTCAGTTAA | AAATCAGATTT | TTTTTT - AAT | TTTGTTTAGA | GAAAGATTTT | 558 |
| FWA 9-5L.ab1  | GGAT AACTGAT | AAATCAGATTT | TTGTTGTTTT | TTTTCAGTTAA | AAATCAGATTT | TTTTTT - AAT | TTTGTTTAGA | GAAAGATTTT | 558 |
| FWA 9-6L.ab1  | GGAT AACTGAT | AAATCAGATTT | TTGTTGTTTT | TTTTCAGTTAA | AAATCAGATTT | TTTTTT - AAT | TTTGTTTAGA | GAAAGATTTT | 559 |
| FWA 9-7L.ab1  | GGAT AACTGAT | AAATCAGATTT | TTGTTGTTTT | TTTTCAGTTAA | AAATCAGATTT | TTTTTT - AAT | TTTGTTTAGA | GAAAGATTTT | 559 |
| FWA 9-8L.ab1  | GGAT AACTGAT | AAATCAGATTT | TTGTTGTTTT | TTTTCAGTTAA | AAATCAGATTT | TTTTTT - AAT | TTTGTTTAGA | GAAAGATTTT | 558 |
| FWA 9-9L.ab1  | GGAT AACTGAT | AAATCAGATTT | TTGTTGTTTT | TTTTCAGTTAA | AAATCAGATTT | TTTTTT - AAT | TTTGTTTAGA | GAAAGATTTT | 559 |
| FWA 9-10L.ab1 | GGAT AACTGAT | AAATCAGATTT | TTGTTGTTTT | TTTTCAGTTAA | AAATCAGATTT | TTTTTT - AAT | TTTGTTTAGA | GAAAGATTTT | 558 |
| FWA 9-11L.ab1 | GGAT AACTGAT | AAATCAGATTT | TTGTTGTTTT | TTTTCAGTTAA | AAATCAGATTT | TTTTTT - AAT | TTTGTTTAGA | GAAAGATTTT | 558 |
| FWA 9-12L.ab1 | GGAT AACTGAT | AAATCAGATTT | TTGTTGTTTT | TTTTCAGTTAA | AAATCAGATTT | TTTTTT - AAT | TTTGTTTAGA | GAAAGATTTT | 559 |
| FWA 9-13L.ab1 | GGAT AACTGAT | AAATCAGATTT | TTGTTGTTTT | TTTTCAGTTAA | AAATCAGATTT | TTTTTT - AAT | TTTGTTTAGA | GAAAGATTTT | 559 |
| FWA 9-14L.ab1 | GGAT AACTGAT | AAATCAGATTT | TTGTTGTTTT | TTTTCAGTTAA | AAATCAGATTT | TTTTTT - AAT | TTTGTTTAGA | GAAAGATTTT | 558 |

|               |            |     |
|---------------|------------|-----|
| fwa repeats   | GGTTCC - - | 563 |
| FWA 9-1L.ab1  | GGTTAAGGG  | 568 |
| FWA 9-2L.ab1  | GGTTAAGGG  | 567 |
| FWA 9-3L.ab1  | GGTTAAGGG  | 567 |
| FWA 9-4L.ab1  | GGTTAAGGG  | 567 |
| FWA 9-5L.ab1  | GGTTAAGGG  | 567 |
| FWA 9-6L.ab1  | GGTTAAGGG  | 568 |
| FWA 9-7L.ab1  | GGTTAAGGG  | 568 |
| FWA 9-8L.ab1  | GGTTAAGGG  | 567 |
| FWA 9-9L.ab1  | GGTTAAGGG  | 568 |
| FWA 9-10L.ab1 | GGTTAAGGG  | 567 |
| FWA 9-11L.ab1 | GGTTAAGGG  | 567 |
| FWA 9-12L.ab1 | GGTTAAGGG  | 568 |
| FWA 9-13L.ab1 | GGTTAAGGG  | 568 |
| FWA 9-14L.ab1 | GGTTAAGGG  | 567 |

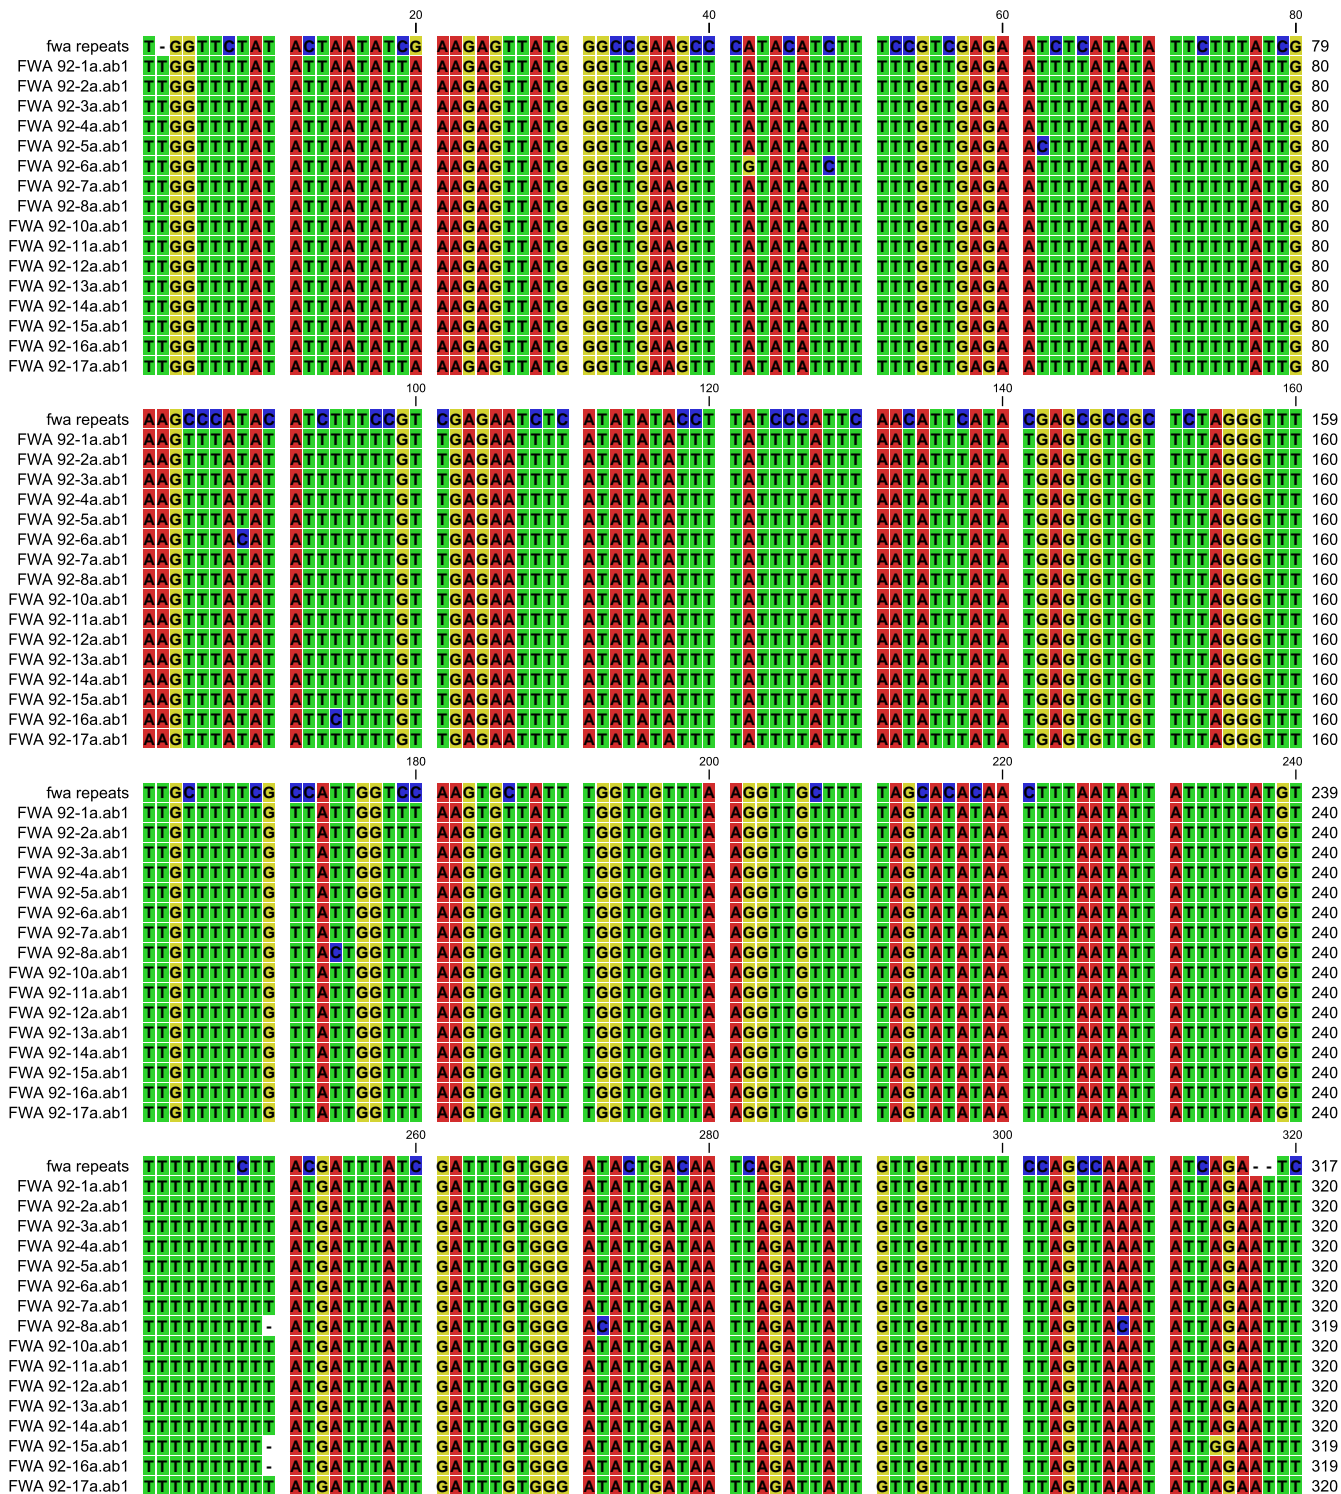

Supplement: pgen.1000280.s003.pdf [file pgen.1000280.s003.pdf]
